# Supplementary material for: Conversion of cellulose to high-yield glucose in water over sulfonated mesoporous carbon fibers with optimized acidity
Source: Royal Society of Chemistry journal article supplement (doi:10.1039/d0gc04342g), 2021-01-01
Supplement: d0gc04342g1.pdf [file d0gc04342g1.pdf]

Supporting Information for

**Conversion of Cellulose to High Yield Glucose in Water over Sulfonated  
Mesoporous Carbon Fibers with Optimized Acidity**

Ying Yang,<sup>1\*</sup> Shuai Shao,<sup>1</sup> Feng Yang, Dale L. Brewe, Shangwei Guo,  
Dongcheng Ren, and Shijie Hao\*

Email: [yyang@cup.edu.cn](mailto:yyang@cup.edu.cn)

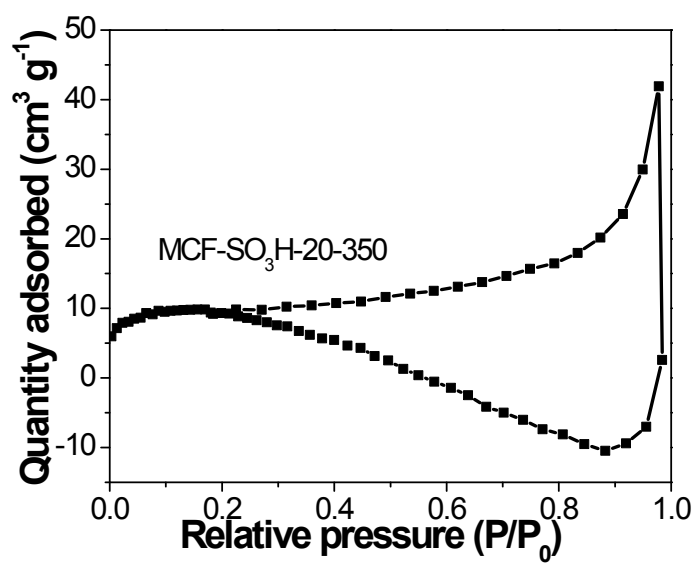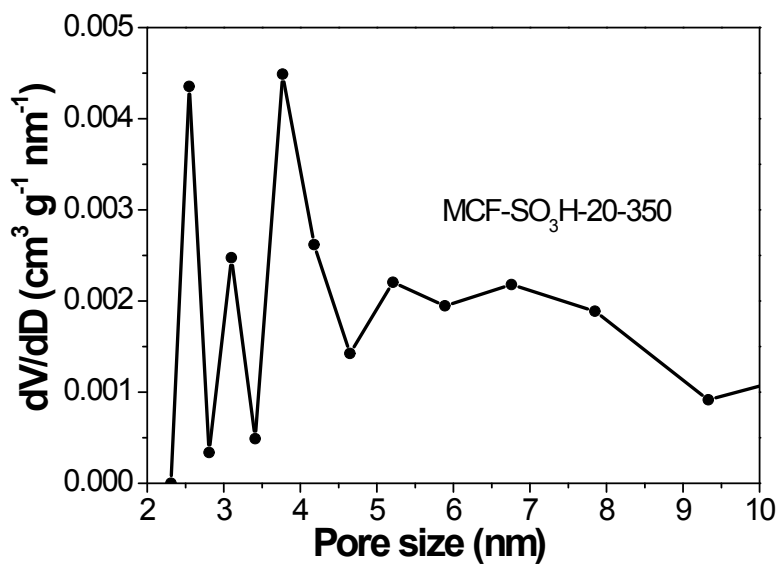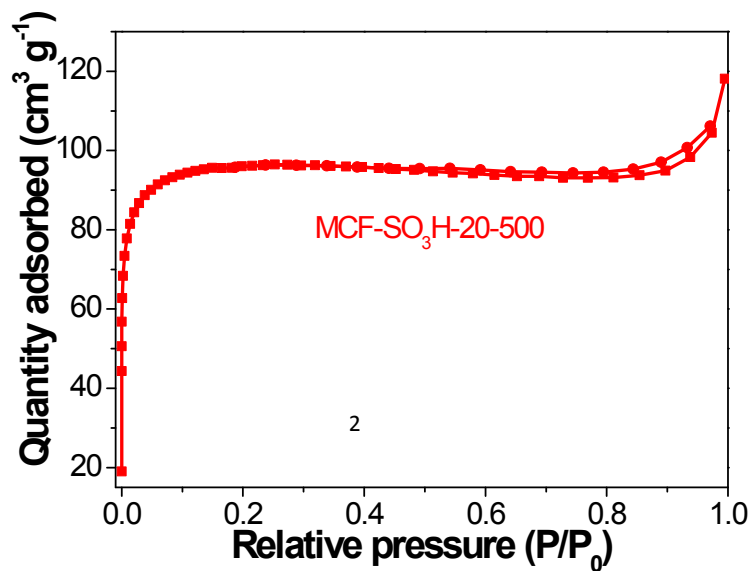

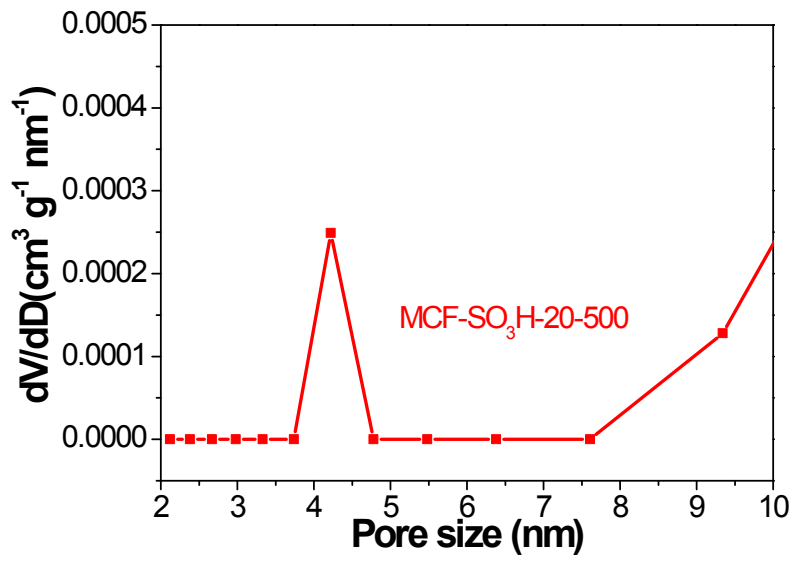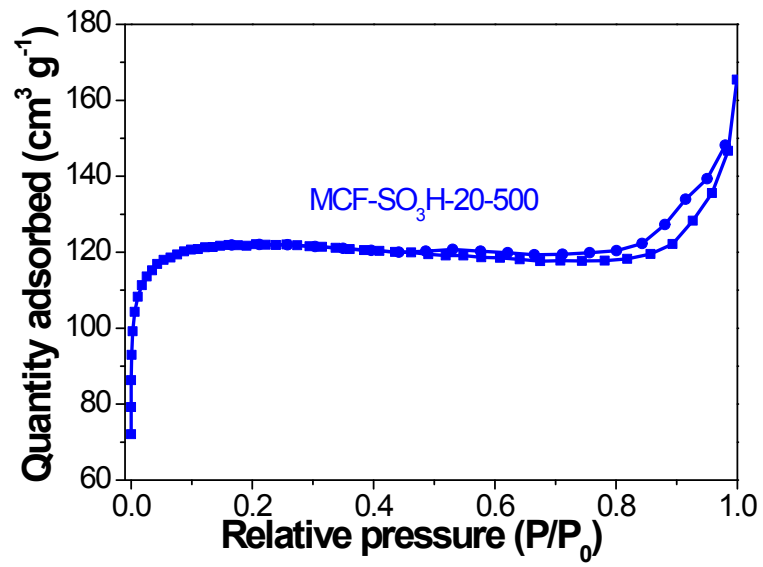

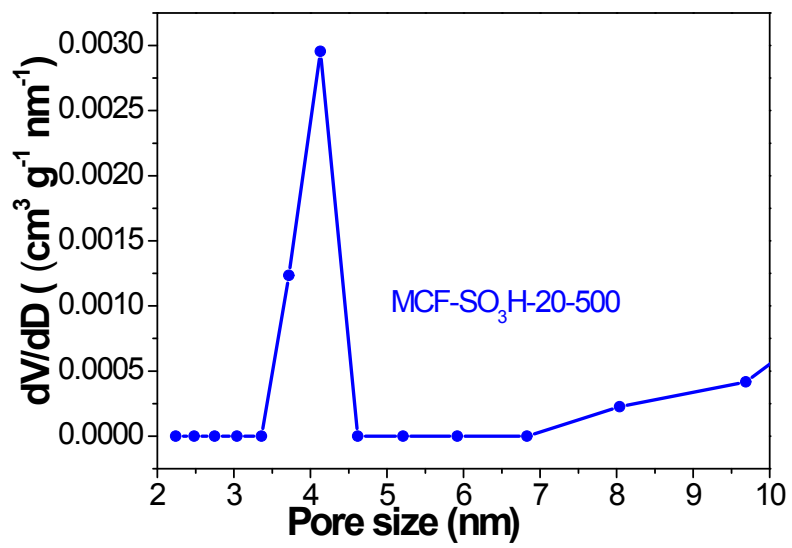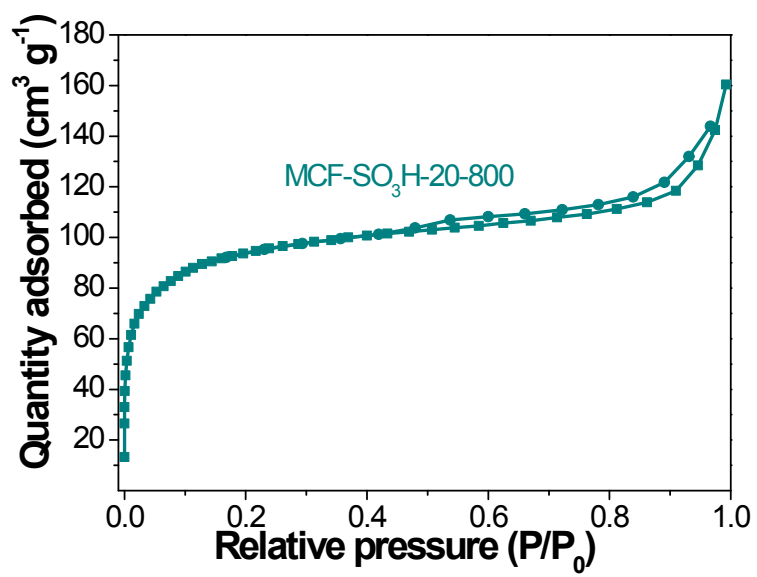

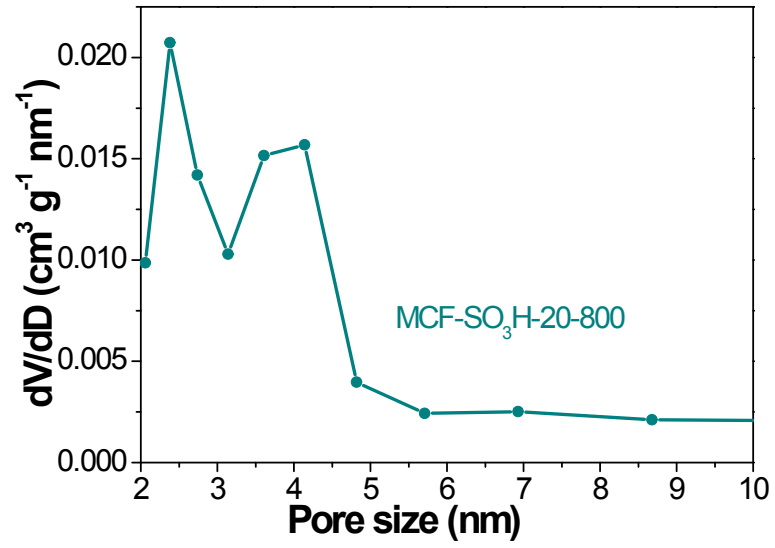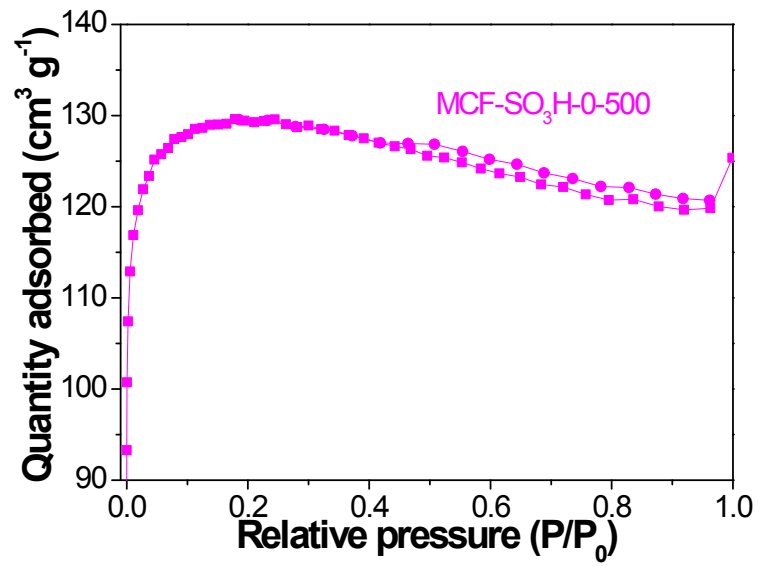

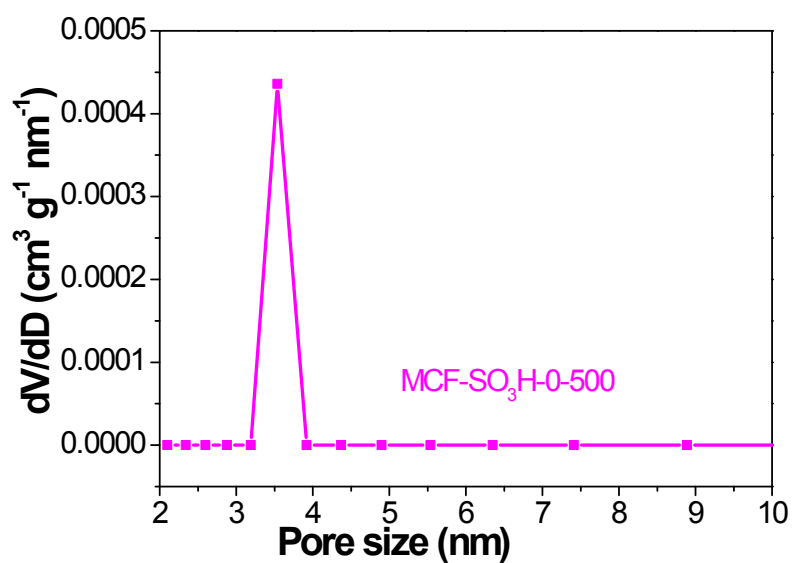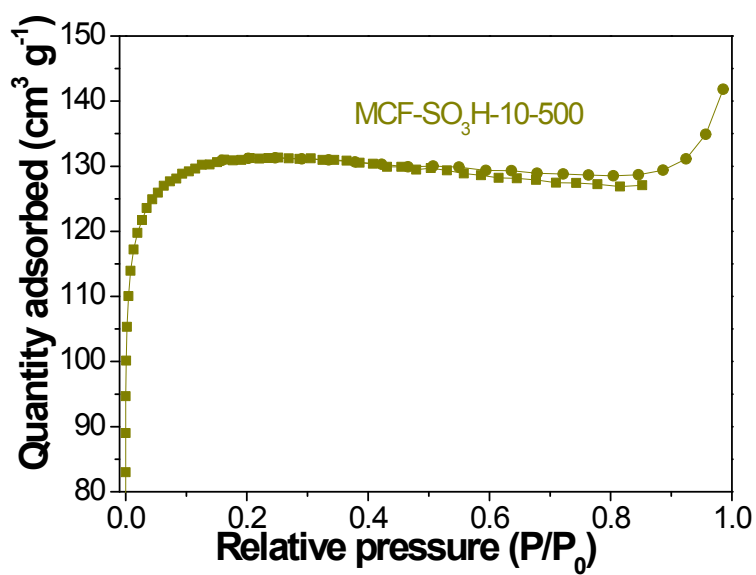

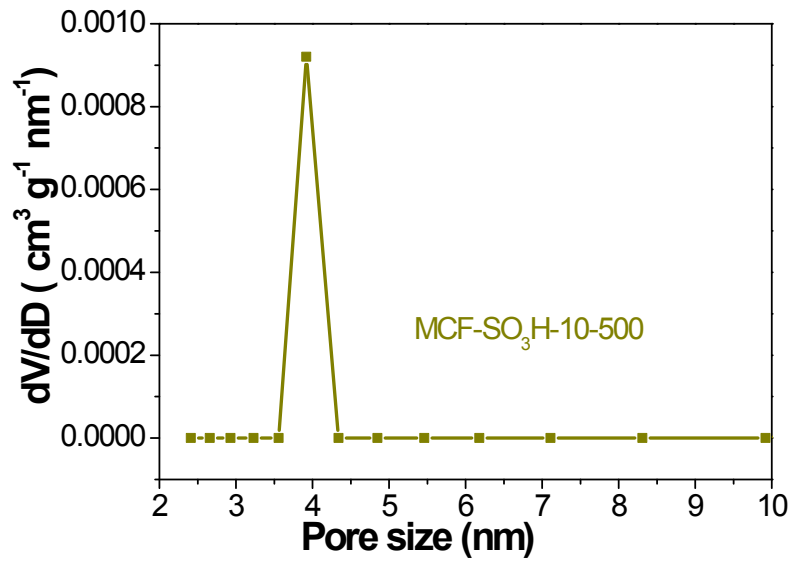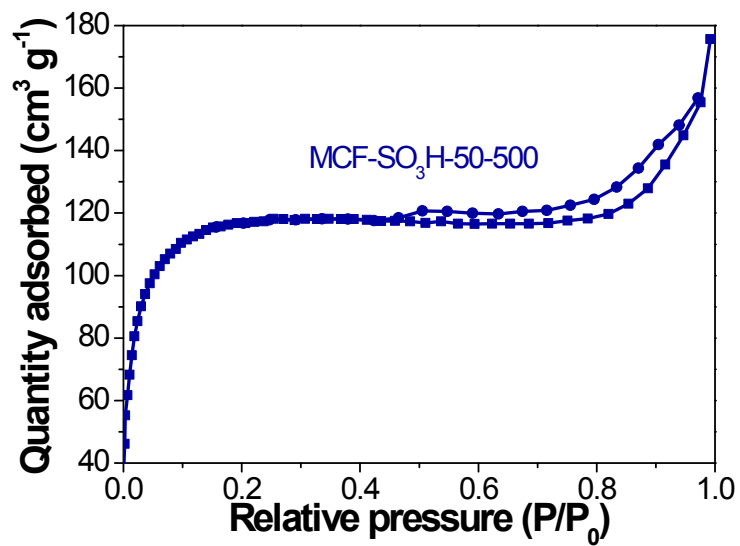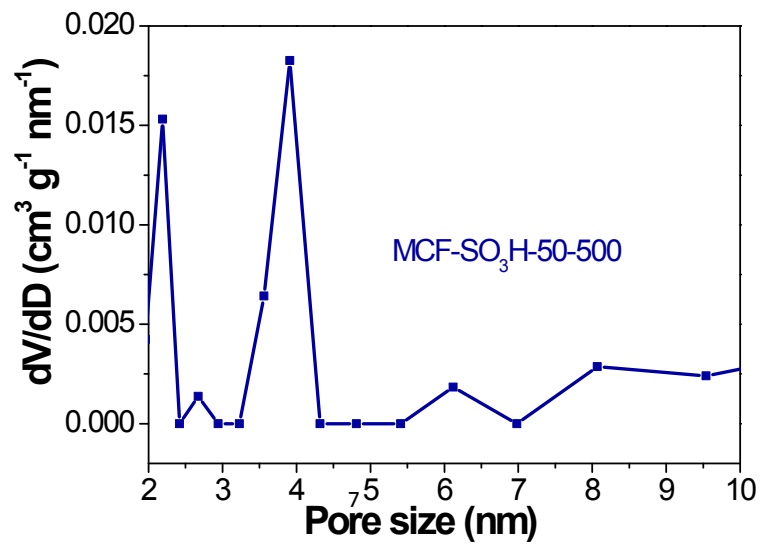

**Fig. S1.** Separated N<sub>2</sub> adsorption/desorption isotherms and the corresponding pore size distribution curves for different MCF-SO<sub>3</sub>H-x-t catalysts.

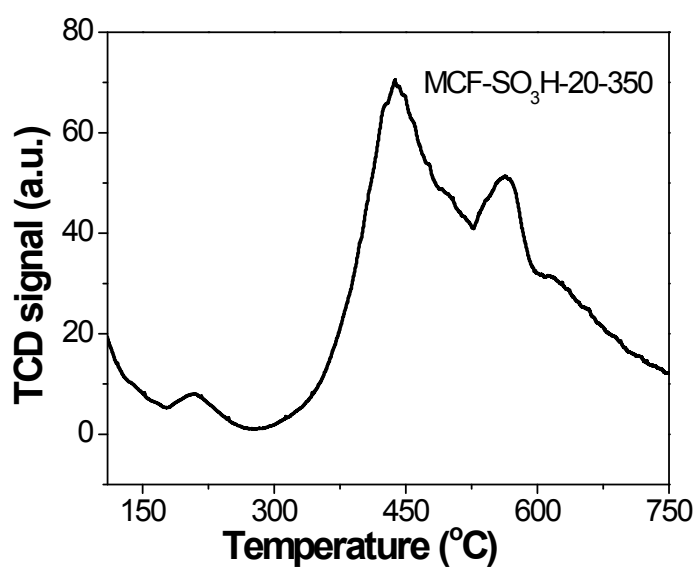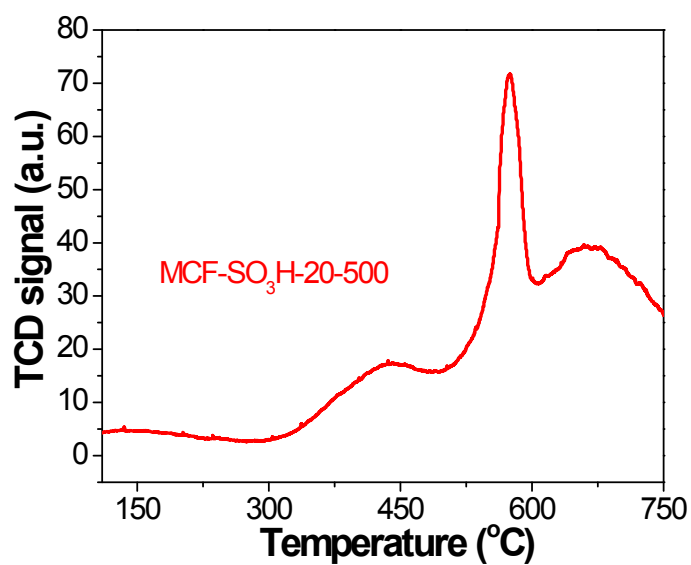



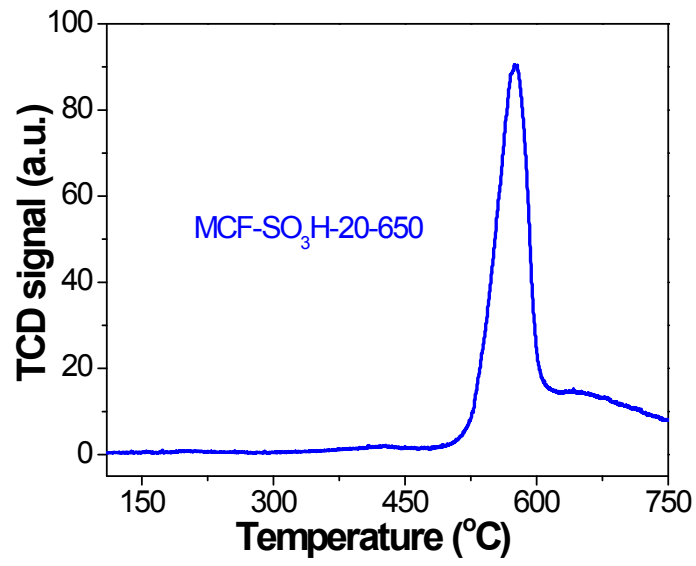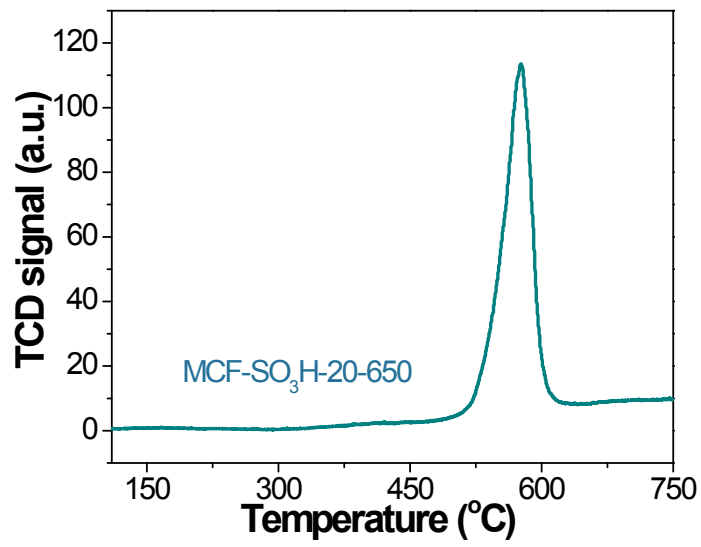

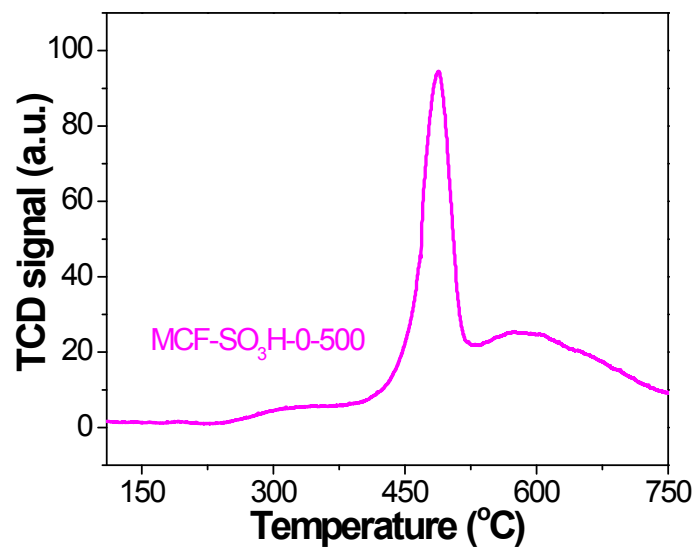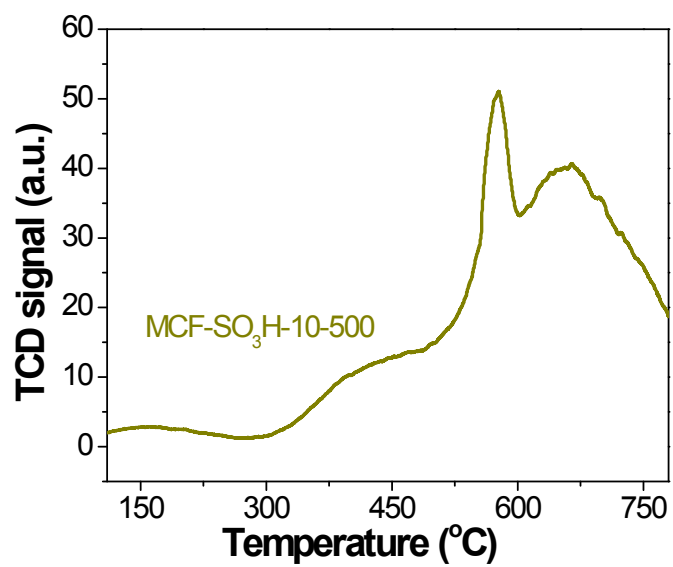

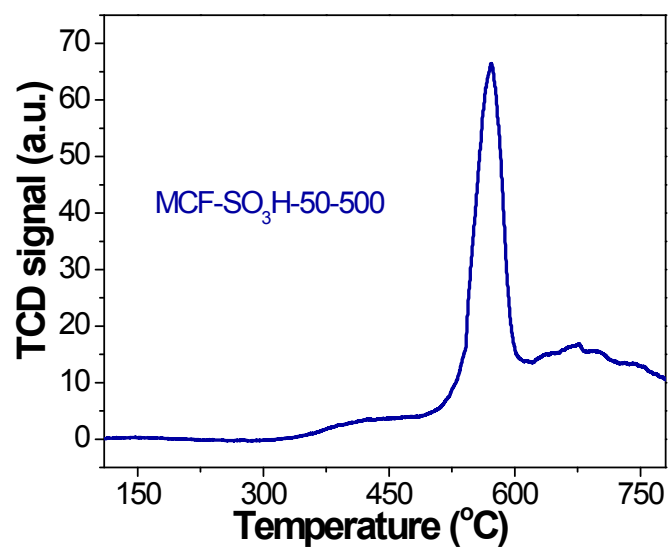

**Fig. S2.** Separated NH<sub>3</sub>-TPD curves for MCF-SO<sub>3</sub>H-x-t catalysts.

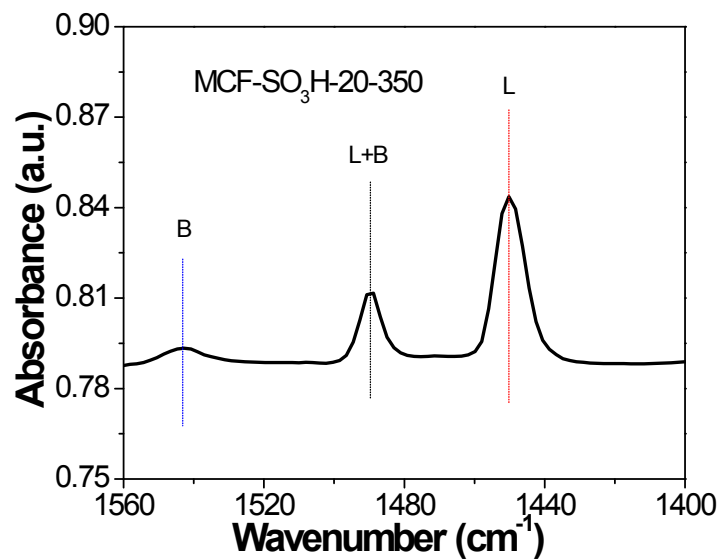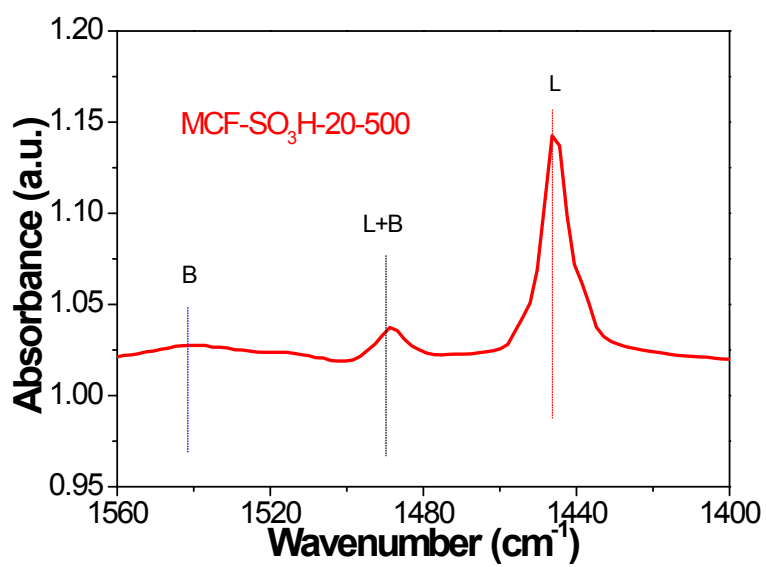

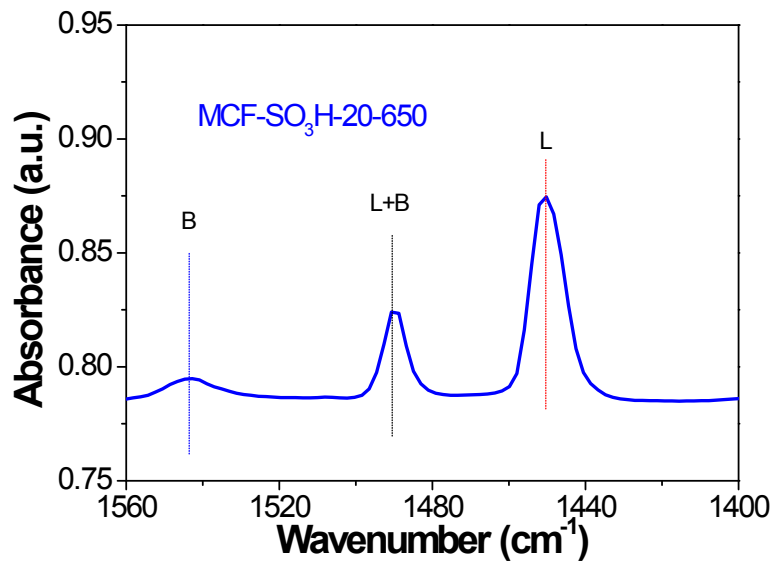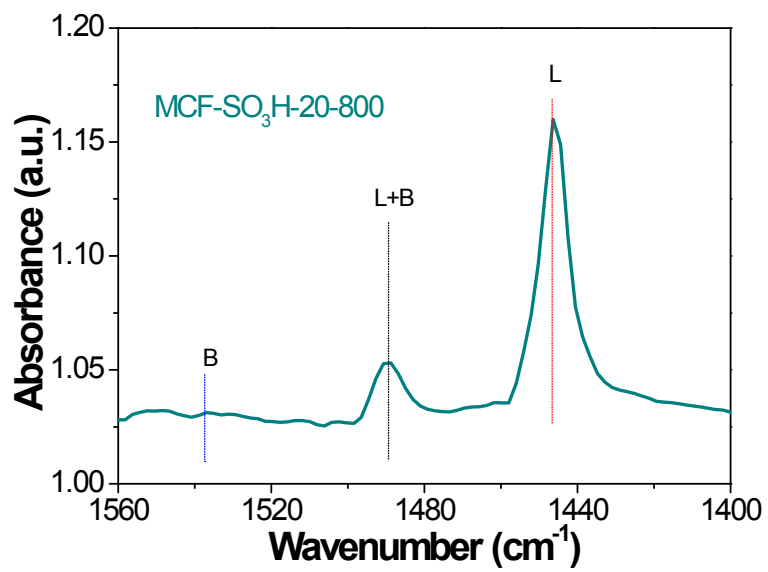

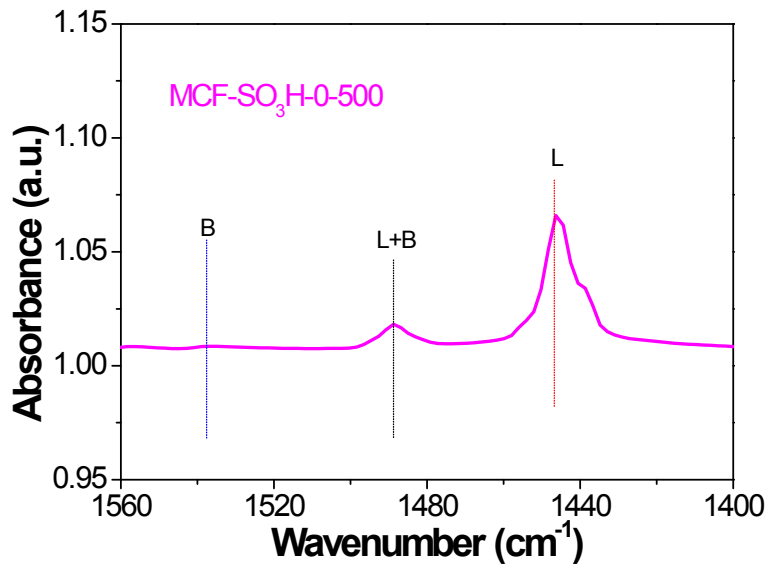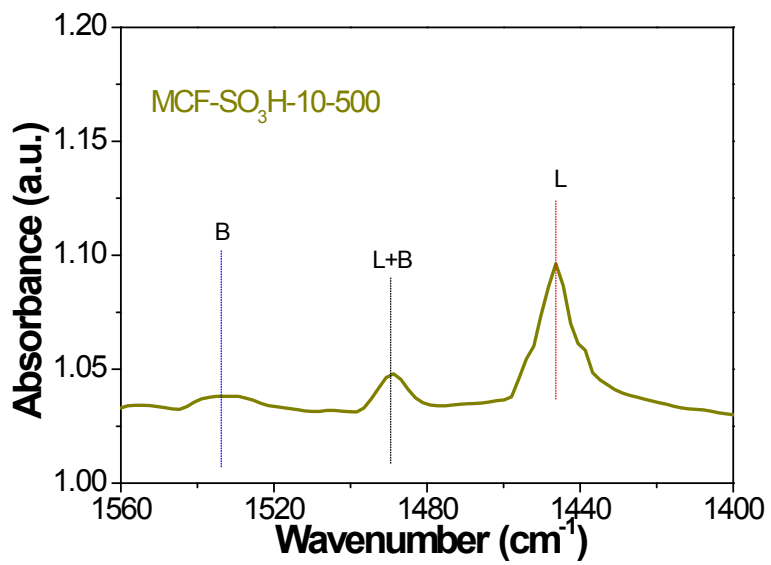

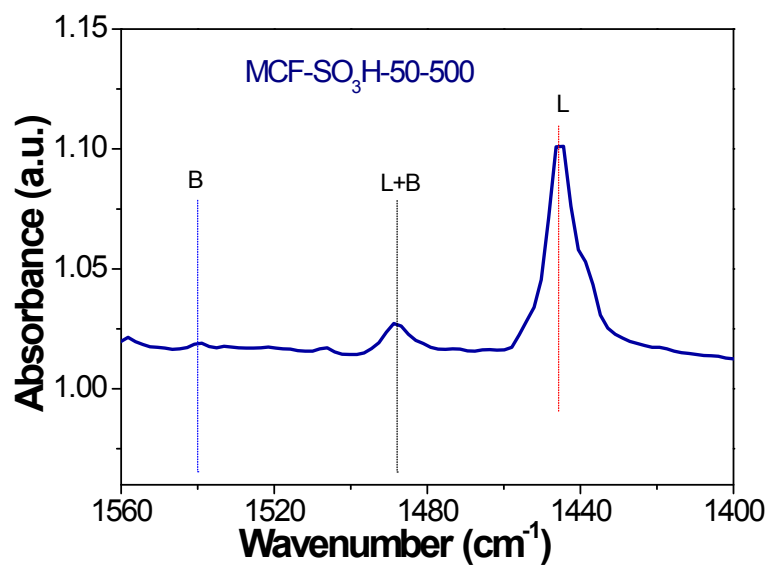

**Fig. S3.** Separated Py-IR spectra for MCF-SO<sub>3</sub>H-x-t catalysts.

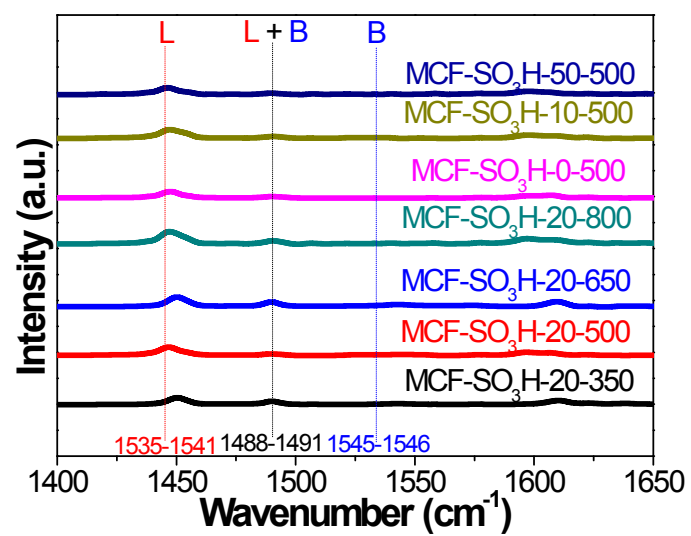

**Fig. S4.** Py-IR spectra for different MCF-SO<sub>3</sub>H-x-t catalysts at 300 °C.



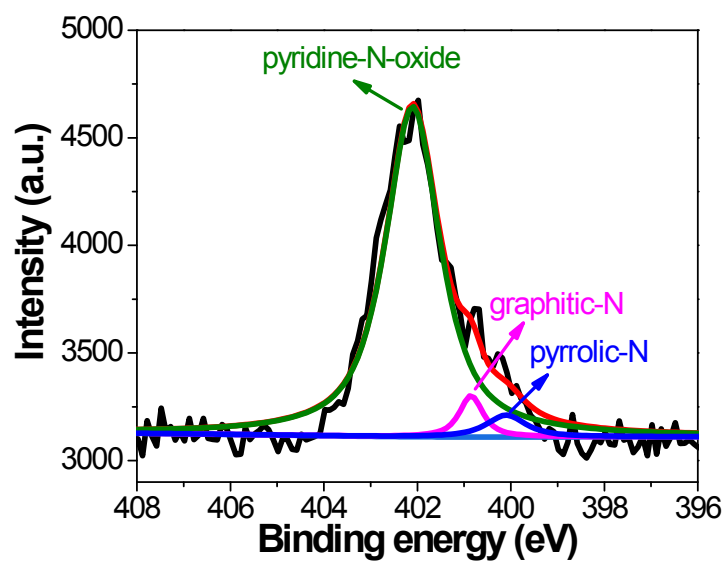

Fig. S5. N 1s XPS spectrum for MCF-SO<sub>3</sub>H-20-500.

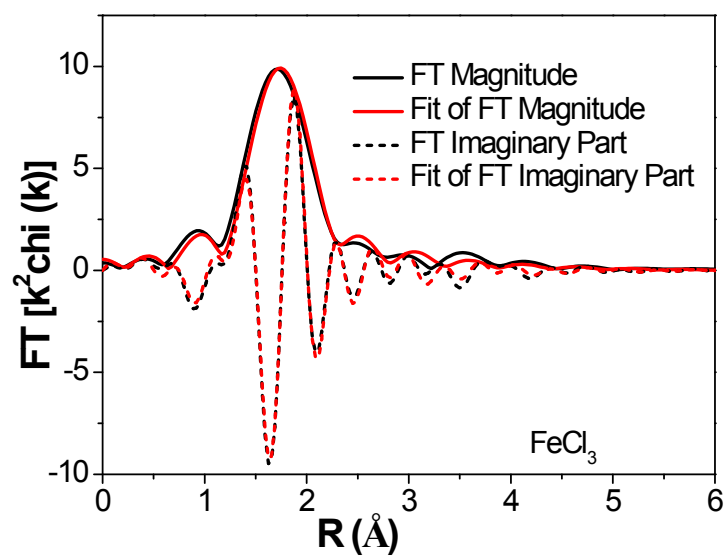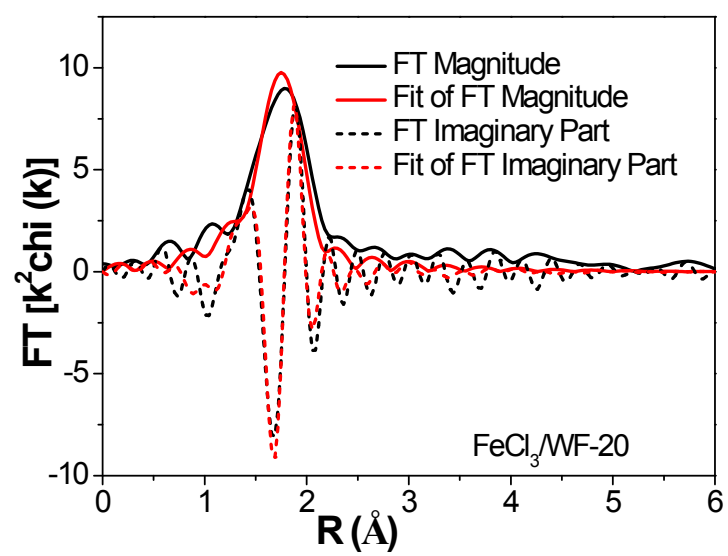

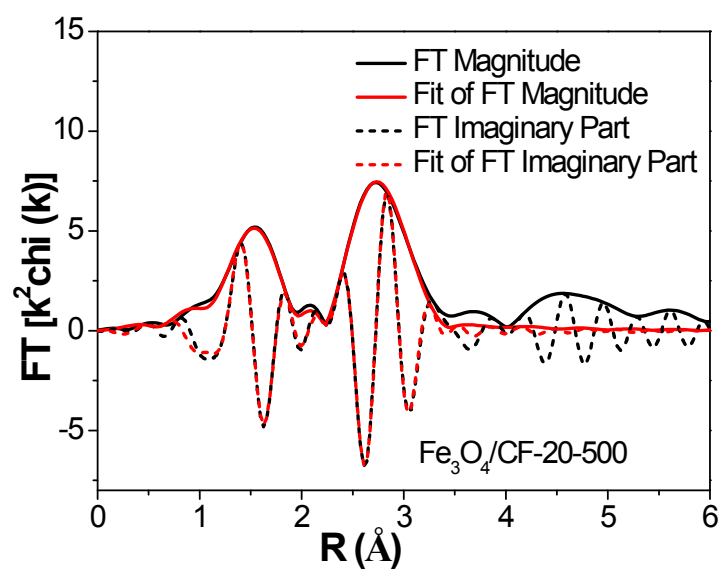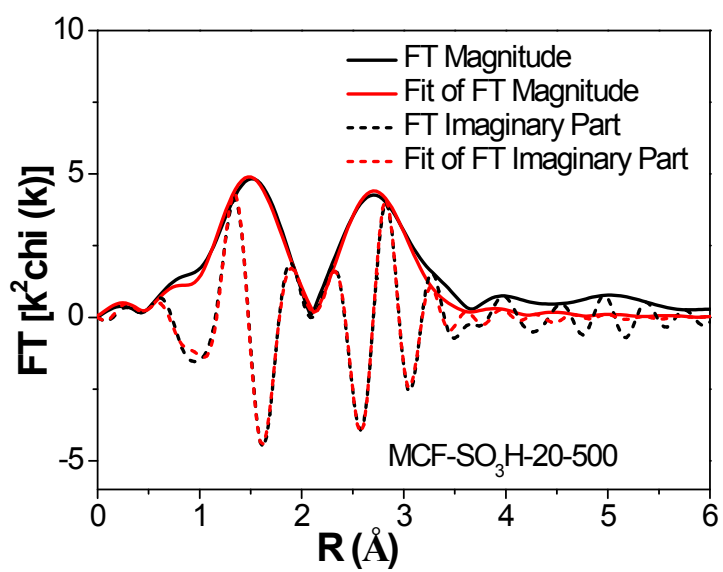

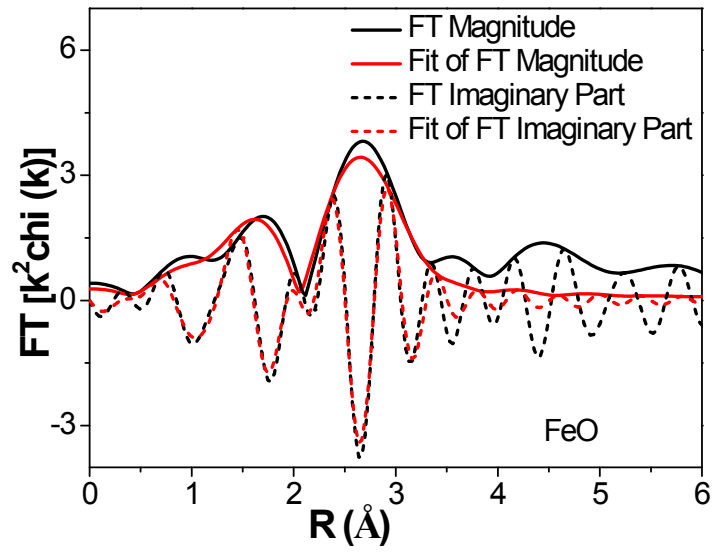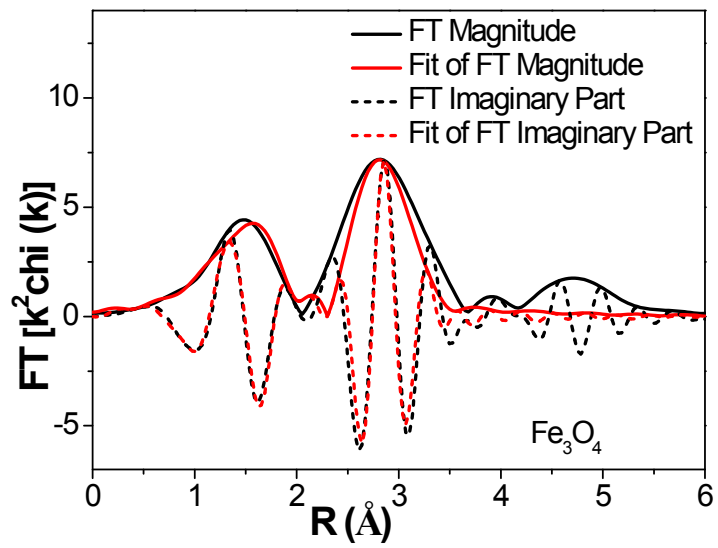

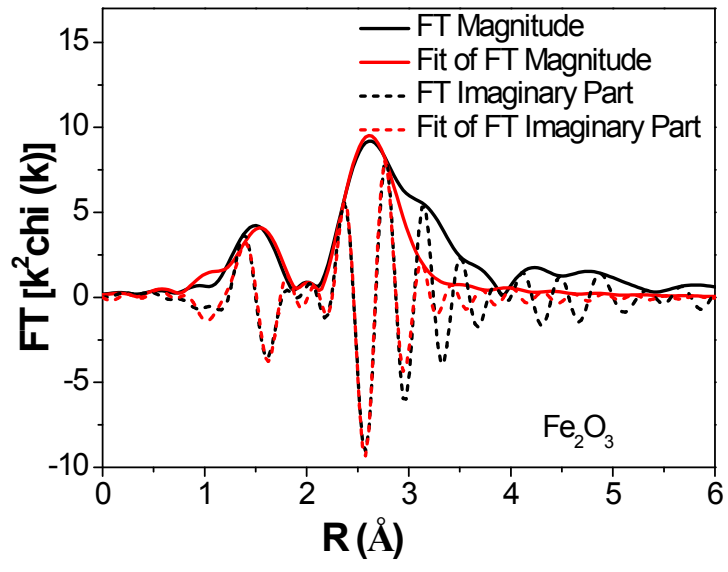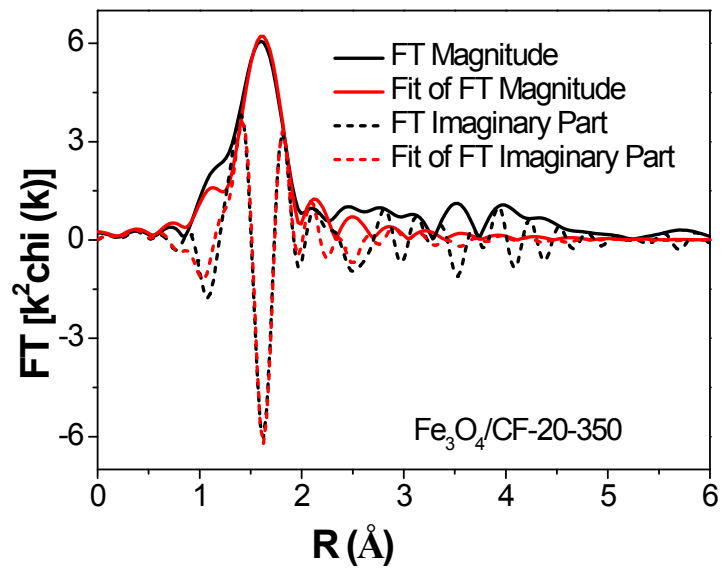

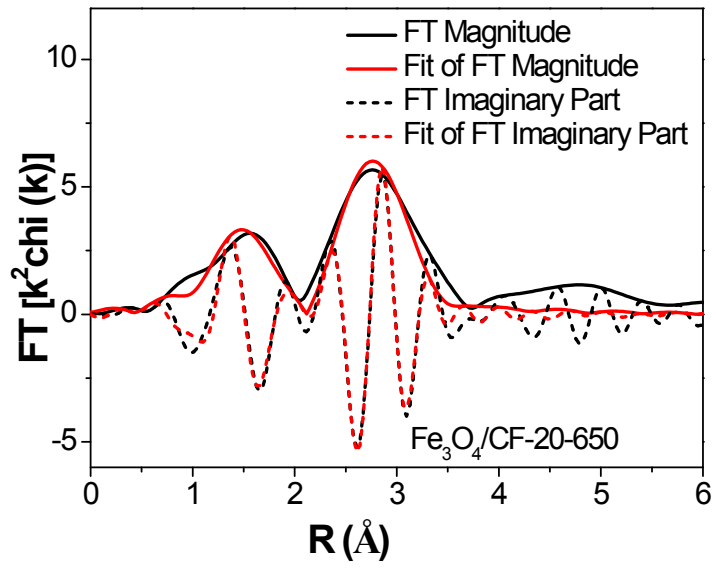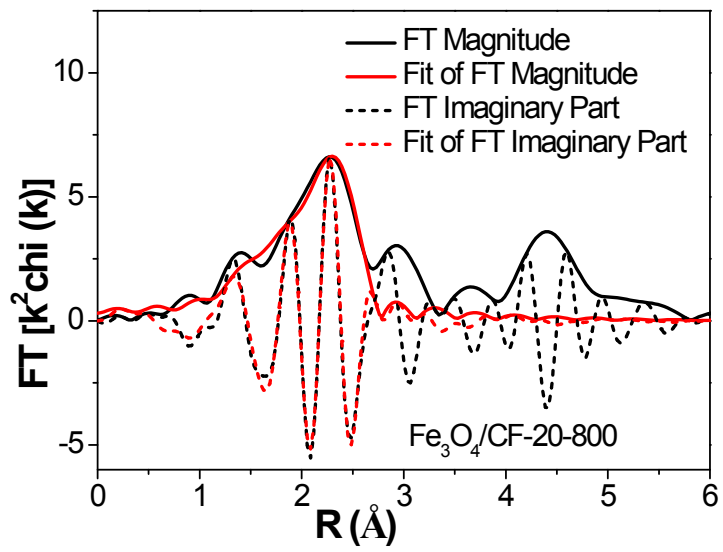

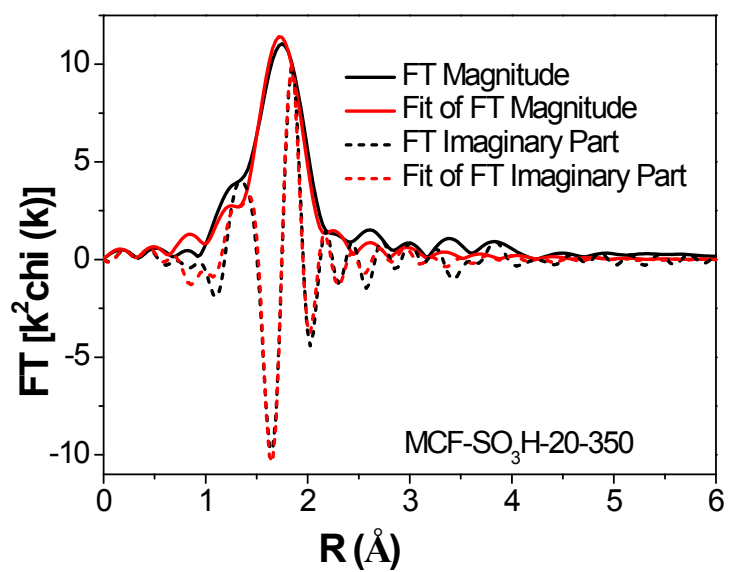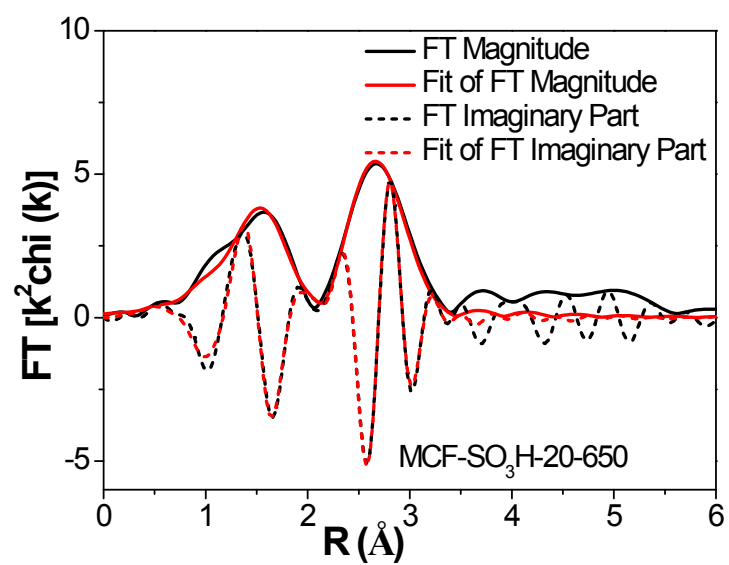

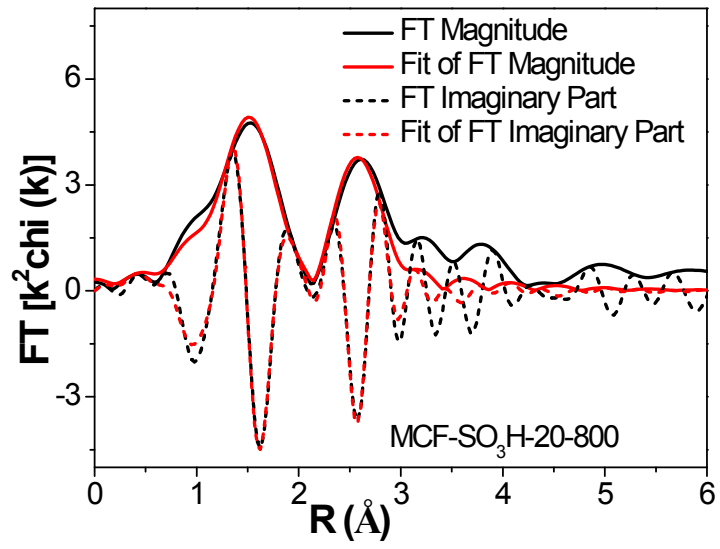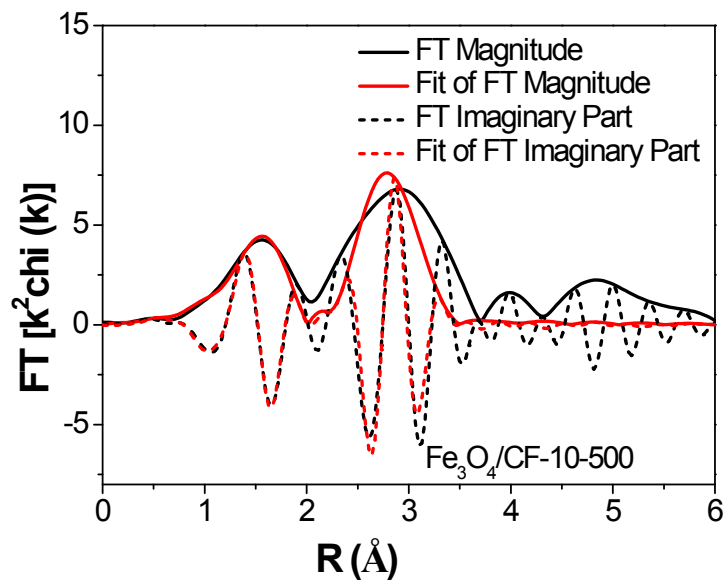



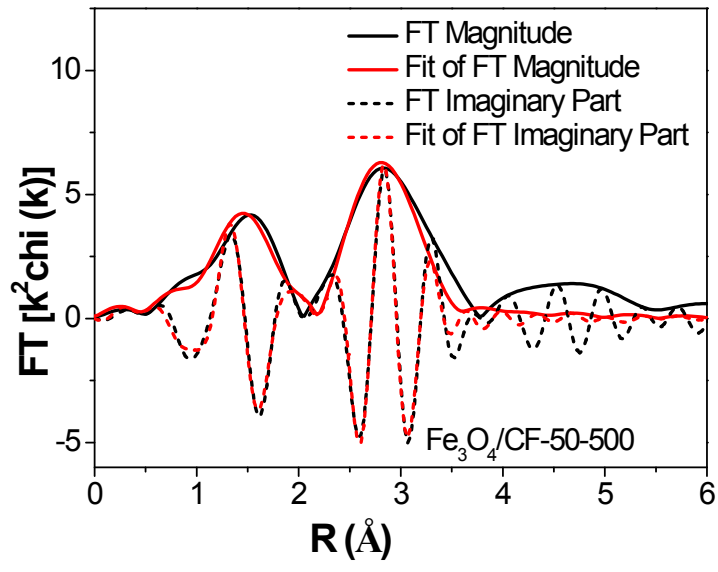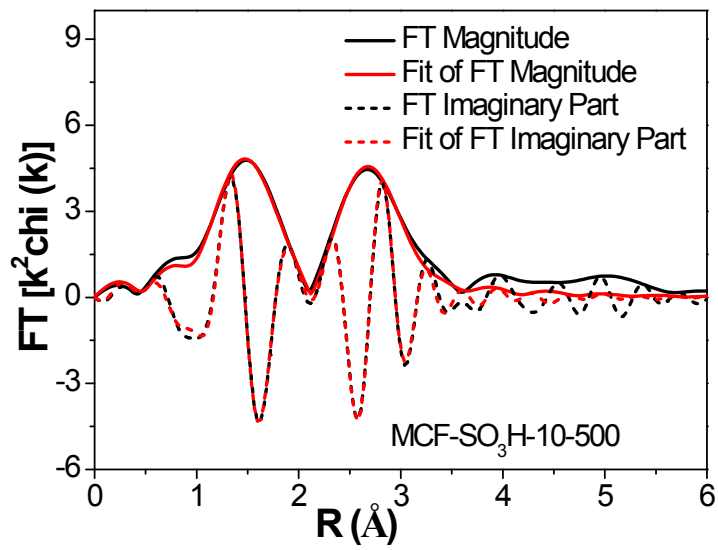

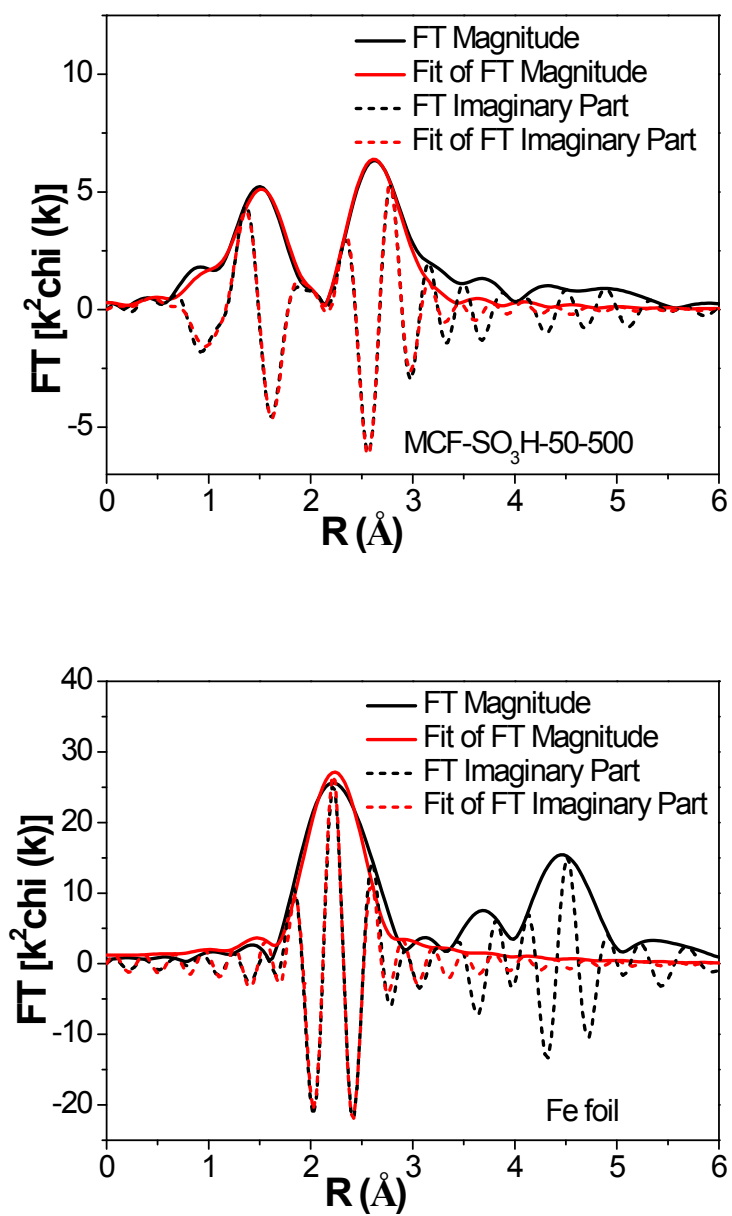

**Fig. S6.** Fourier transformed  $k^2$ -weighted EXAFS oscillations measured at Fe K-edge for various Fe-containing samples.

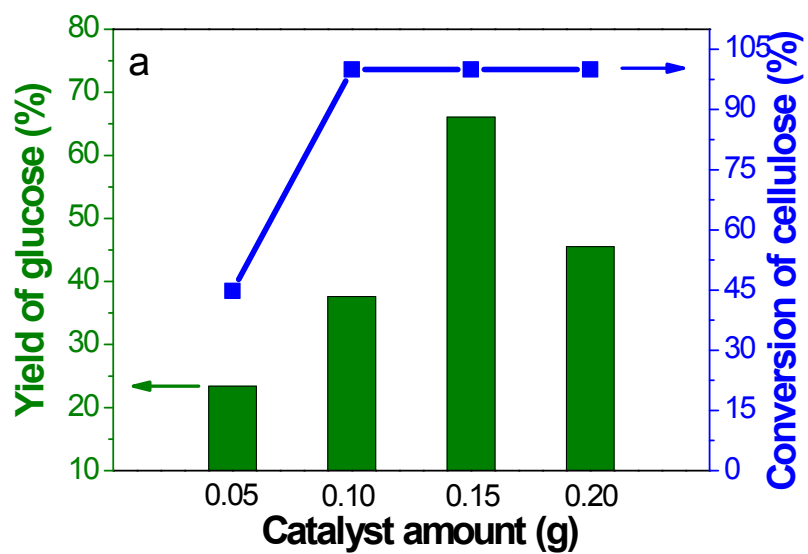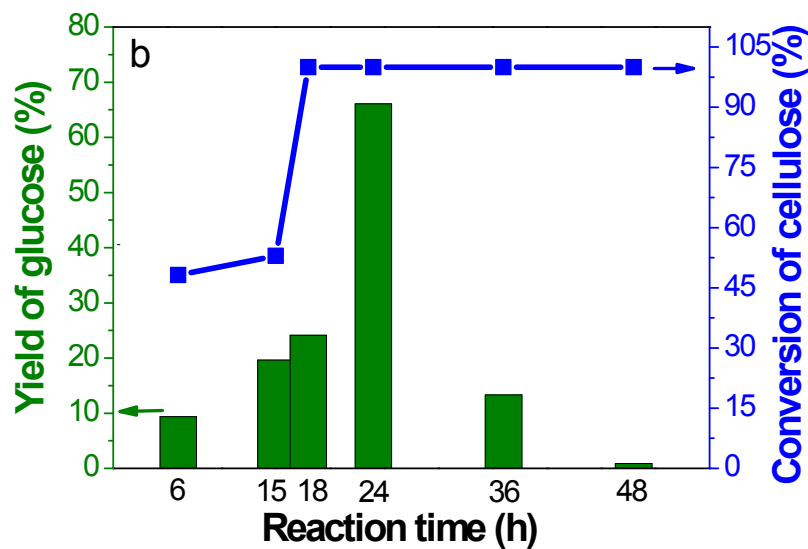

**Fig. S7.** Glucose yields in the conversion of cellulose using MCF-SO<sub>3</sub>H-20-500 (a) at a different catalyst amount and (b) at a different duration.

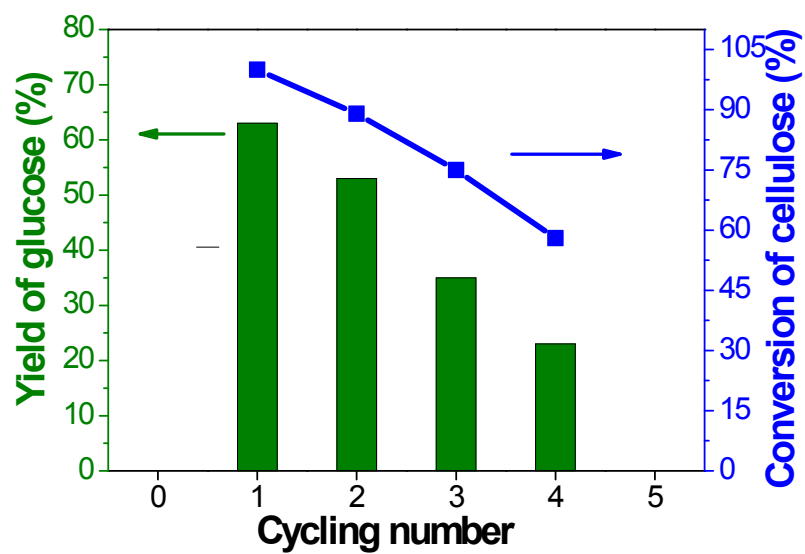

**Fig. S8.** Cycling stability of MCF-SO<sub>3</sub>H-20-500 towards cellulose hydrolysis.

Reaction conditions: 0.15 g catalyst, 0.05 g cellulose, 10 mL water, 150 °C and 24 h.
